# Supplementary material for: Effect of dark sweet cherry (Prunus avium) supplementation on the fecal microbiota, metabolic endotoxemia, and intestinal permeability in obese subjects: a single-blind randomized trial
Source: Royal Society of Chemistry journal article supplement (doi:10.1039/d4fo01650e), 2024-01-01
Supplement: d4fo01650e1.pdf [file d4fo01650e1.pdf]

**Supplementary Table S1.** Single reaction monitoring (SRM) conditions for lactulose and mannitol quantification in urine samples.

| <b>Compound</b> | <b>Precursor (m/z)</b> | <b>Product (m/z)</b> | <b>Collision Energy (V)</b> |
|-----------------|------------------------|----------------------|-----------------------------|
| Mannitol        | 181.07                 | 58.97                | 24.50                       |
| Mannitol        | 181.07                 | 89.04                | 18.06                       |
| Mannitol        | 181.07                 | 101.04               | 17.47                       |
| Lactulose       | 341.21                 | 101.04               | 20.42                       |
| Lactulose       | 341.21                 | 161.11               | 7.95                        |
| Lactulose       | 341.21                 | 179.04               | 8.07                        |

**Supplementary Table S2.** Primer sequences used for mRNA analyses.

| <b>Primer</b> | <b>Sequence 5'-3'</b>                                                  |
|---------------|------------------------------------------------------------------------|
| REG-4         | Reverse: GCATTGGCCCCAGTAGTGGCTT<br>Forward: CACTCGCCCAACCTTGCTCA       |
| IL-22         | Reverse: TTTCAAAGGTACATGCTGAGTCAAC<br>Forward: ACCCCTAAATAGCTTCATGTTCC |
| 18S           | Reverse: GGACATCTAAGGGCATCACAG<br>Forward: ACACGGACAGGATTGACAGA        |

**Supplementary Table S3.** Relative abundance of bacteria whose abundances were different between cherry and placebo at D1

| Bacterial Taxa                  | Treatment                    |                               | Difference (Cherry- Placebo) |                |
|---------------------------------|------------------------------|-------------------------------|------------------------------|----------------|
|                                 | Cherry (n=19)                | Placebo (n=21)                | Mean (95% CI)                | p value        |
| $\Delta$ g_ <i>Anaerostipes</i> | -2.26 (-2.69, -1.82)         | -1.10 (-1.51, -0.69)          | -1.15 (-1.78, -0.52)         | < <b>0.001</b> |
| $\Delta$ s_ <i>A. hadrus</i>    | -2.87 (-3.62, -2.11)         | -1.55 (-2.27, -0.83)          | -1.31 (-2.44, -0.17)         | <b>0.02</b>    |
| $\Delta$ g_ <i>Blautia</i>      | -3.28 (-5.34, -1.23)         | -0.33 (-2.28, 1.60)           | -2.95 (-5.89, -0.01)         | <b>0.04</b>    |
| $\Delta$ g_ <i>Roseburia</i>    | 1.23 (-0.07, 2.53)<br>n = 13 | -0.29 (-1.82, 1.24)<br>n = 10 | 1.52 (-0.68, 3.73)           | 0.16           |

Data are estimated marginal means (95% CI) obtained after adjustment for significant D1 values. Statistical differences between marginal means were determined using unpaired t test with Welch correction. A p-value < 0.05 was considered statistically significant. The taxonomic lineage of each taxon is g: genus, s: species.

**Supplementary Table S4: Alpha diversity index**

| Alpha diversity index | Cherry (n=19)           |                         | Placebo (n=21)          |                         | Sliced by treatment and/or day |
|-----------------------|-------------------------|-------------------------|-------------------------|-------------------------|--------------------------------|
|                       | D1                      | D30                     | D1                      | D30                     |                                |
| Shannon               | 4.78 (4.58, 4.97)       | 4.78 (4.50, 5.06)       | 4.97 (4.82, 5.13)       | 4.97 (4.81, 5.13)       | n.s                            |
| Chao 1                | 142.79 (134.00, 151.57) | 149.70 (138.90, 160.50) | 144.70 (137.04, 152.35) | 153.47 (142.25, 164.68) | n.s                            |
| OTUS                  | 142.04 (135.76, 148.31) | 137.97 (127.25, 148.70) | 147.10 (136.62, 157.58) | 139.69 (131.40, 147.97) | n.s                            |
| Simpson               | 0.91 (0.90, 0.93)       | 0.90 (0.88, 0.93)       | 0.93 (0.92, 0.95)       | 0.93 (0.93, 0.94)       | n.s                            |

Data are mean (95% CI). Alpha diversity measures in each group at different time points were analyzed by Kruskal Wallis test. A p-value < 0.05 was considered statistically significant. n.s: non-significant.

**Supplementary Table S5: Beta diversity index**

| Group 1    | Group 2     | Sample size | Permutations | p values |             |                  |                  |
|------------|-------------|-------------|--------------|----------|-------------|------------------|------------------|
|            |             |             |              | Jaccard  | Bray-Curtis | Weighted Unifrac | Unweight Unifrac |
| Cherry D1  | Cherry D30  | 38          | 999          | 1.00     | 0.97        | 0.72             | 1.00             |
| Placebo D1 | Placebo D30 | 40          | 999          | 1.00     | 0.97        | 0.14             | 1.00             |
| Cherry D1  | Placebo D1  | 40          | 999          | 0.08     | 0.006       | 0.04             | 0.06             |
| Cherry D30 | Placebo D30 | 40          | 999          | 0.16     | 0.003       | 0.02             | 0.14             |

**Supplementary Table S6.** Intestinal permeability markers in cherry and placebo

| Variable                                               | Treatment                                |                                          |                              |                                | p value                     |
|--------------------------------------------------------|------------------------------------------|------------------------------------------|------------------------------|--------------------------------|-----------------------------|
|                                                        | Cherry (n=19)                            |                                          | Placebo (n=21)               |                                |                             |
|                                                        | D1                                       | D30                                      | D1                           | D30                            |                             |
| <b>LBP</b>                                             | 12.76 (10.94, 14.57)                     | 14.45 (12.87, 16.07)                     | 14.4 (12.8, 16.0)            | 13.44 (11.44, 15.45)           | n.s                         |
| <b>Lactulose (L)</b><br>(% recovery/<br>ingested dose) | 0.01 (0.01, 0.02) <sup>A</sup><br>n = 13 | 0.06 (0.02, 0.11) <sup>B</sup><br>n = 13 | 0.09 (-0.03, 0.22)<br>n = 15 | 0.03 (0.01, 0.05)<br>n = 15    | Cherry ↑D30<br>(p = 0.0081) |
| <b>Mannitol (M)</b><br>(% recovery/<br>ingested dose)  | 4.63 (3.25, 6.00)<br>n = 13              | 5.78 (4.27, 7.29)<br>n = 13              | 4.61 (3.51, 5.70)<br>n = 15  | 5.27 (3.43, 7.10)<br>n = 15    | n.s                         |
| <b>L/M</b>                                             | 0.005 (0.002, 0.007)<br>n = 13           | 0.01 (0.003, 0.01)<br>n = 13             | 0.11 (-0.07, 0.30)<br>n = 15 | 0.008 (0.003, 0.014)<br>n = 15 | n.s                         |
| <b>REG-4*</b>                                          | 8.43 (1.80, 15.06)<br>n = 15             |                                          | 1.98 (-0.33, 4.31)<br>n = 18 |                                | n.s                         |
| <b>IL-22*</b>                                          | 2.89 (0.84, 4.93)<br>n = 15              |                                          | 4.55 (-0.06, 9.17)<br>n = 18 |                                | n.s                         |

Values are mean (95% CI). Wilcoxon matched-pairs rank test was used to assess differences within treatments. Mann-Whitney test was used to evaluate differences between treatments. A p-value < 0.05 was considered statistically significant. (\*) Data are presented as a D30 fold change of D1. n.s: non-significant.
