# Supplementary material for: Effect of dark sweet cherry (Prunus avium) supplementation on the fecal microbiota, metabolic endotoxemia, and intestinal permeability in obese subjects: a single-blind randomized trial
Source: Royal Society of Chemistry journal article supplement (doi:10.1039/d4fo01650e), 2024-01-01
Supplement: d4fo01650e3.pdf [file d4fo01650e3.pdf]

1 **Supplementary Figures Captions**

2

3 **Supplementary Figure 1.** Schematic representation of study schedule.

4 **Supplementary figure 2. Beta diversity PCoA plots based on A) Weighted Unifrac and B)**  
5 **Bray Curtis distances.** Combined cherry and placebo datasets indicating differences at D1 and  
6 D30. P values resulted from PERMANOVA analysis between treatments.

7

8
