# Supplementary figures and images for: Effect of dark sweet cherry (Prunus avium) supplementation on the fecal microbiota, metabolic endotoxemia, and intestinal permeability in obese subjects: a single-blind randomized trial
Source: Royal Society of Chemistry journal article supplement (doi:10.1039/d4fo01650e), 2024-01-01

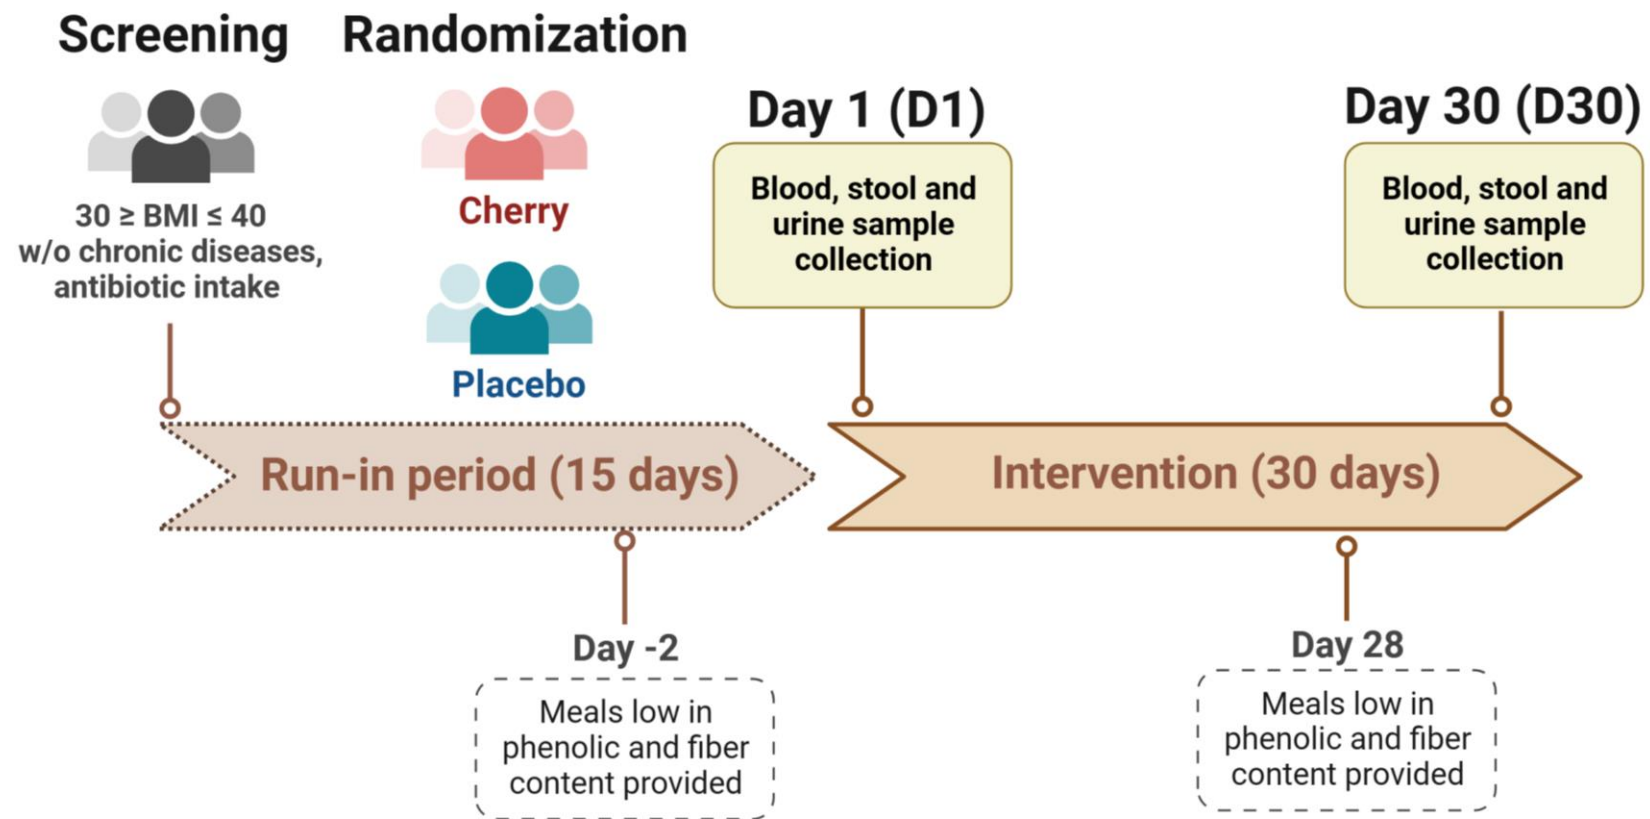

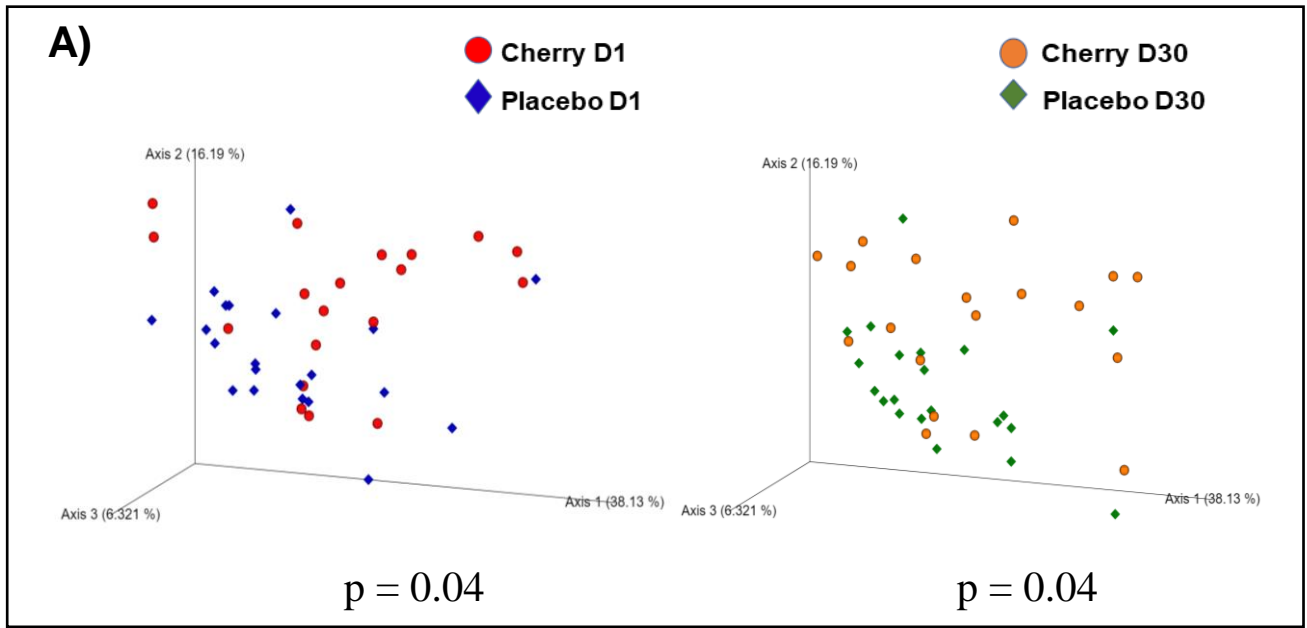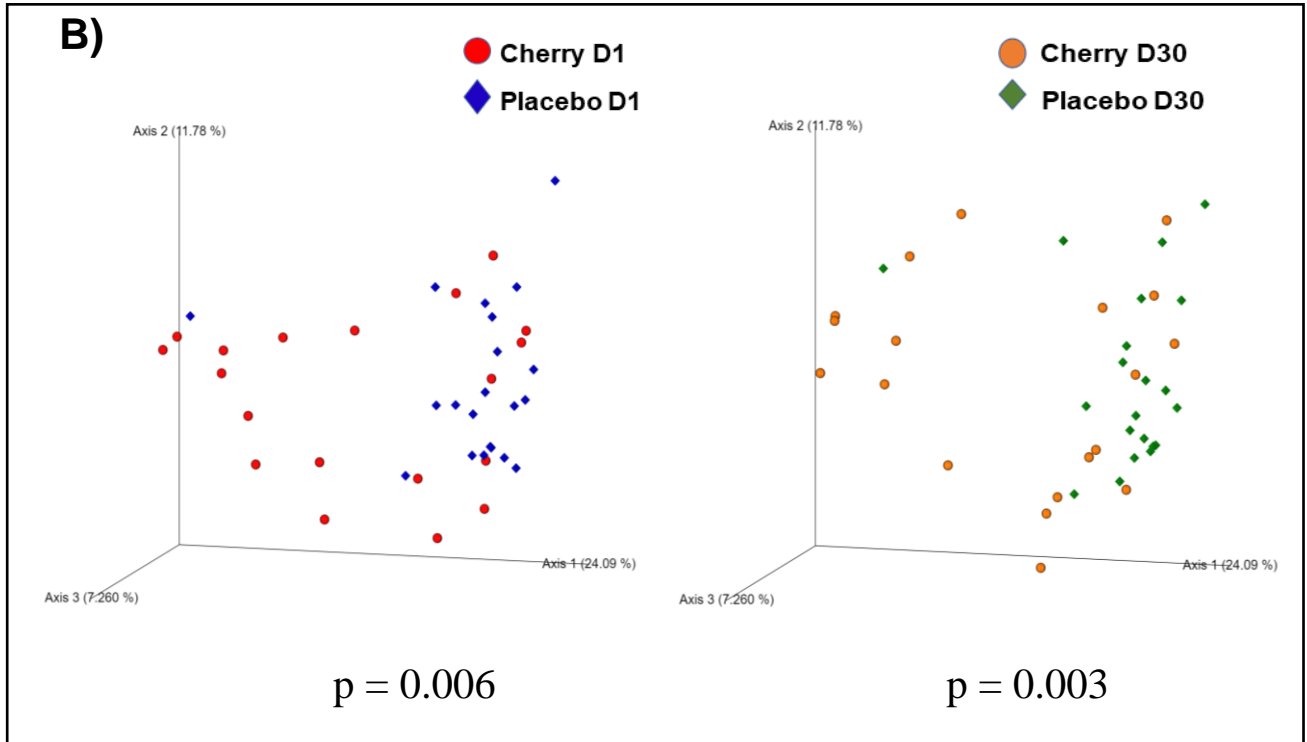

Supplement: d4fo01650e2.pdf [file d4fo01650e2.pdf]
